# Supplementary material
Source: ML conference proceedings conference paper supplement (https://openaccess.thecvf.com/content/CVPR2025/html/Hao_Neural_Motion_Simulator_CVPR_2025_paper.html)
Supplement: Supplementary file 1 [file Hao_Neural_Motion_Simulator_CVPR_2025_supplemental.pdf]

# Neural Motion Simulator

## Pushing the Limit of World Models in Reinforcement Learning

### Supplementary Material

#### A. Architecture

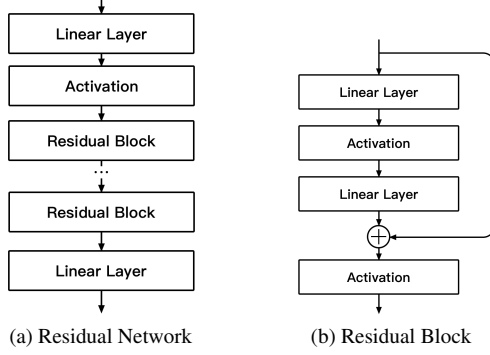

Figure 7. Network architecture of residual networks.

| Basic NN         | Layers                        | Input Shape             | Output Shape             |
|------------------|-------------------------------|-------------------------|--------------------------|
| Residual Network | Fully-connected layer         | $(B, D_{\text{input}})$ | $(B, D_h)$               |
|                  | Activation                    | $(B, D_h)$              | $(B, D_h)$               |
|                  | Residual Blocks               | $(B, D_h)$              | $(B, D_h)$               |
|                  | Fully-connected layer         | $(B, D_h)$              | $(B, D_{\text{output}})$ |
| MLP              | Fully-connected layer         | $(B, D_{\text{input}})$ | $(B, D_h)$               |
|                  | Activation                    | $(B, D_h)$              | $(B, D_h)$               |
|                  | Hidden Fully-connected Blocks | $(B, D_h)$              | $(B, D_h)$               |
|                  | Fully-connected layer         | $(B, D_h)$              | $(B, D_{\text{output}})$ |

Table 8. Basic NNs

| Module                    | Basic NN         | Input Shape                   | Output Shape                  |
|---------------------------|------------------|-------------------------------|-------------------------------|
| Position Encoder (M)      | Residual Network | $(B, D_q)$                    | $(B, D_v \times (D_v + 1)/2)$ |
|                           | Rearrange        | $(B, D_v \times (D_v + 1)/2)$ | $(B, D_v, D_v)$               |
| State Encoder (B)         | Residual Network | $(B, D_q + D_v)$              | $(B, D_v)$                    |
| Action Encoder ( $\tau$ ) | MLP              | $(B, D_a)$                    | $(B, D_v)$                    |
| Corrector                 | Residual Network | $(B, D_q + D_v + D_a)$        | $(B, D_v)$                    |

Table 9. MoSim Modules

| Model Size | Position Encoder |       | State Encoder |       | Action Encoder |       | Correctors |       |       |
|------------|------------------|-------|---------------|-------|----------------|-------|------------|-------|-------|
|            | $N_B$            | $D_h$ | $N_B$         | $D_h$ | $N_B$          | $D_h$ | $N_C$      | $N_B$ | $D_h$ |
| Small      | 3                | 64    | 3             | 64    | 1              | 32    | 1          | 5     | 64    |
| Medium     | 3                | 64    | 3             | 64    | 3              | 32    | 1          | 5     | 128   |
| Large      | 3                | 128   | 3             | 128   | 3              | 128   | 3          | 5     | 128   |

Table 10. MoSim Parameters

For the position encoder and state encoder in the predictor, as well as the corrector, we use residual networks as shown in Figure 7a, with the residual block design illustrated in Figure 7b. For the action encoder in the predictor,

| Prediction Horizon | Cheetah | Reacher | Acrobot | Panda | Hopper | Humanoid | Go2 |
|--------------------|---------|---------|---------|-------|--------|----------|-----|
| DreamerV3          | 16      | 16      | 16      | 16    | 16     | 16       | 16  |
| MoSim              | 60      | >1000   | 99      | >1000 | 51     | 42       | 200 |

Table 11. Prediction Horizon

we use a standard MLP composed of multiple linear layers and activation layers. In the position encoder, the output vector of length  $n(n+1)/2$  (where  $n$  is the dimension of velocity) from the residual network is rearranged into an  $n \times n$  lower triangular matrix  $L$ , and the symmetric positive definite matrix  $M$  is then obtained by computing  $LL^T$ .

The number of correctors can be adjusted based on the complexity of the task. We use one corrector for most tasks, while two correctors are used for the humanoid task.

The specific architectural parameters of the models are detailed in Tables 8, 9, and 10, in which  $B$  refers to batch size,  $D_{\text{input}}$ ,  $D_{\text{output}}$ ,  $D_h$ ,  $D_q$ ,  $D_v$ ,  $D_a$  respectively refer to dimension of input, output, latent variable, position, velocity, action.

#### B. Experimental Details for Latent Evaluation

In subsection 3.2, we compared the predictive capabilities in the latent space of MoSim and TD-MPC2 using expert data, as described in the main text. For the comparison on random data in table 4, we still used the provided TD-MPC2 checkpoints, since training TD-MPC2 on random data leads to a meaningless latent space.

In this experiment, 1 step for MoSim is equivalent to control step \* action repeat. Here, the control step refers to the duration of a single action in terms of physics timesteps in the DM Control environment, while the action repeat follows the default TD-MPC setting of 2. For example, in the Humanoid environment (control step = 5, action repeat = 2), 1 step actually requires us to recursively predict  $2 * 5 = 10$  physical steps, for experience evaluation, we set action repeat = 1, control step = 1.

#### C. Prediction Horizon

To more directly demonstrate the improvement in MoSim’s prediction capability, Table 11 uses the MSE loss of DreamerV3 at a 16-step prediction horizon as a reference. It presents the prediction horizon at which MoSim achieves the same loss, providing a more intuitive measure of MoSim’s predictive performance.

| Task Name | Humanoid-walk | Hopper-hop |
|-----------|---------------|------------|
| Horizon   | 1000          | 1000       |

Table 12. The minimum step limitation required for zero-shot learning in two additional tasks.(1000 is typically the default step limit in reinforcement learning simulation environments.)

## D. Zero-Shot Learning Requirements

In subsection 3.4, we explored the minimal step limitation required to achieve zero-shot learning. We additionally provide the requirements for two more tasks. The results are shown in Table 12.

## E. MyoSuite Dataset Prediction Results

We also conducted predictions on the MyoSuite dataset. To satisfy MoSim’s assumption of the Markov property, instead of directly using the muscle-tendon model in MyoSuite (where actions in this case form a second-order dynamic system, causing the overall system to violate the Markov property), we directly used the motor-tendon model. Specifically, we obtained the force on each tendon and learned its effect on joint states.

## F. Experimental Settings for Residual Flow Penalty

To ensure the penalty term is on the same scale as the original reward, we use the log probability density of the current state under the flow-based model as the penalty term and add it directly to the original reward. To normalize the penalty term within the range of  $[-1, 1]$ , we apply a sigmoid function with a custom inflection point and then subtract 1. This transformation ensures that the penalty term is appropriately scaled for reinforcement learning.

Thus, the final reward function is given by:

$$R = R_{\text{original}} + R_{\text{penalty}} \quad (9)$$

where the penalty term  $R_{\text{penalty}}$  is defined as:

$$R_{\text{penalty}} = \sigma \left( \frac{\log P(\mathbf{s}) - \tau}{\alpha} \right) - 1 \quad (10)$$

where  $\log P(\mathbf{s})$  is obtained using the normalizing flow model as:

$$\log P(\mathbf{s}) = \log P_{\text{base}}(x) + \log |\det J| \quad (11)$$

with:

$$x, \log |\det J| = f^{-1}(\mathbf{s}) \quad (12)$$

where:

- $f^{-1}$  is the inverse transformation of the normalizing flow model,

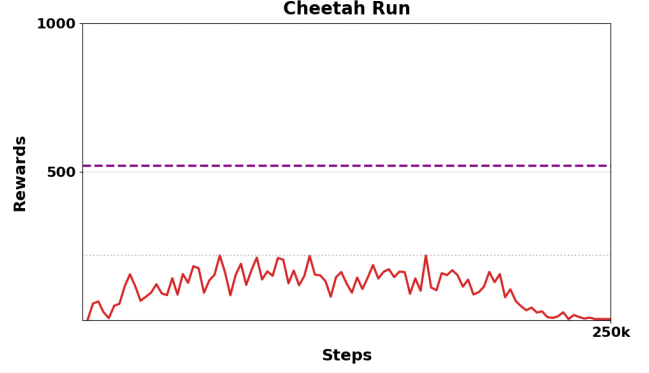

Figure 8. offline cheetah run.

- $P_{\text{base}}(x)$  is the probability density function of the base distribution (e.g., Gaussian),
- $J$  is the Jacobian matrix of the transformation,
- $\sigma(x) = \frac{1}{1+e^{-x}}$  is the sigmoid function,
- $\tau$  is the custom inflection point,
